# Supplementary material for: Light-emitting properties of donor–acceptor and donor–acceptor–donor dyes in solution, solid, and aggregated states: structure–property relationship of emission behavior
Source: Royal Society of Chemistry journal article supplement (doi:10.1039/c5ra18231j), 2015-01-01
Supplement: c5ra18231j1.pdf [file c5ra18231j1.pdf]

Supporting Information of

Light-emitting properties of donor–acceptor and donor–acceptor–donor dyes in solution, solid, and aggregated states: structure–property relationship of emission behavior

Tsutomu Ishi-i,<sup>\*a</sup> Kei Ikeda,<sup>b</sup> Michiaki Ogawa<sup>a</sup> and Yutarou Kusakaki<sup>b</sup>

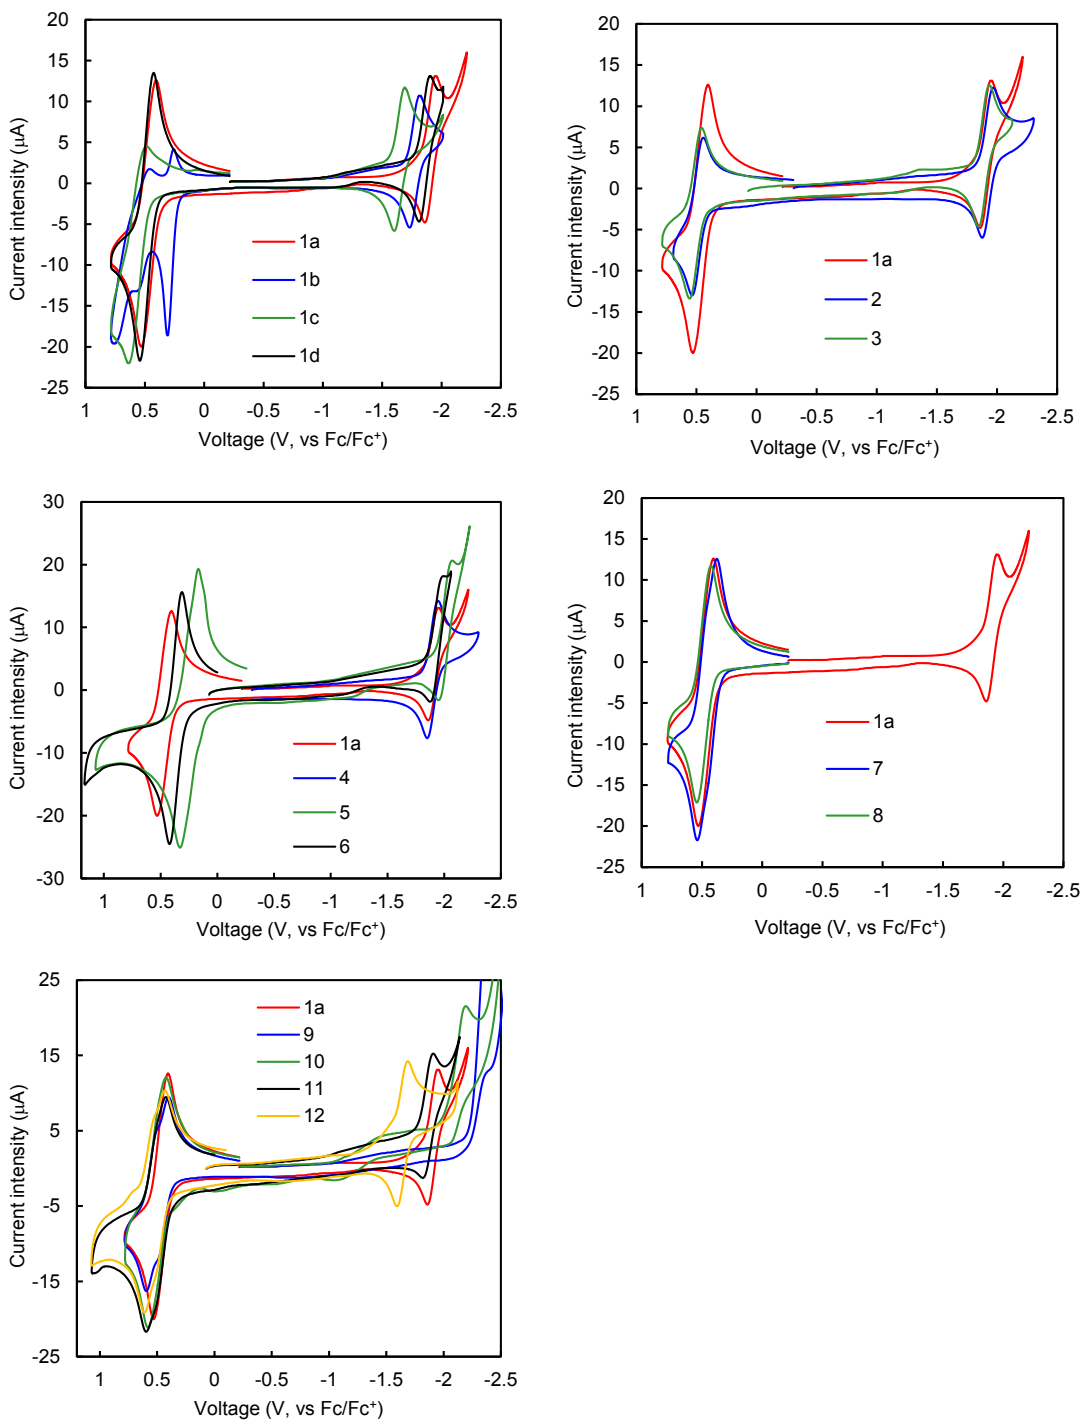

**Fig. S1** Cyclic voltammograms of **1a**, **1b**, **1c**, **1d**, **2**, **3**, **4**, **5**, **6**, **7**, **8**, **9**, **10**, **11**, and **12** in dichloromethane ( $5.0 \times 10^{-4}$  M) in the presence of tetrabutylammonium hexafluoroborate (0.1 M) at the scan rate of  $100 \text{ mVs}^{-1}$ .

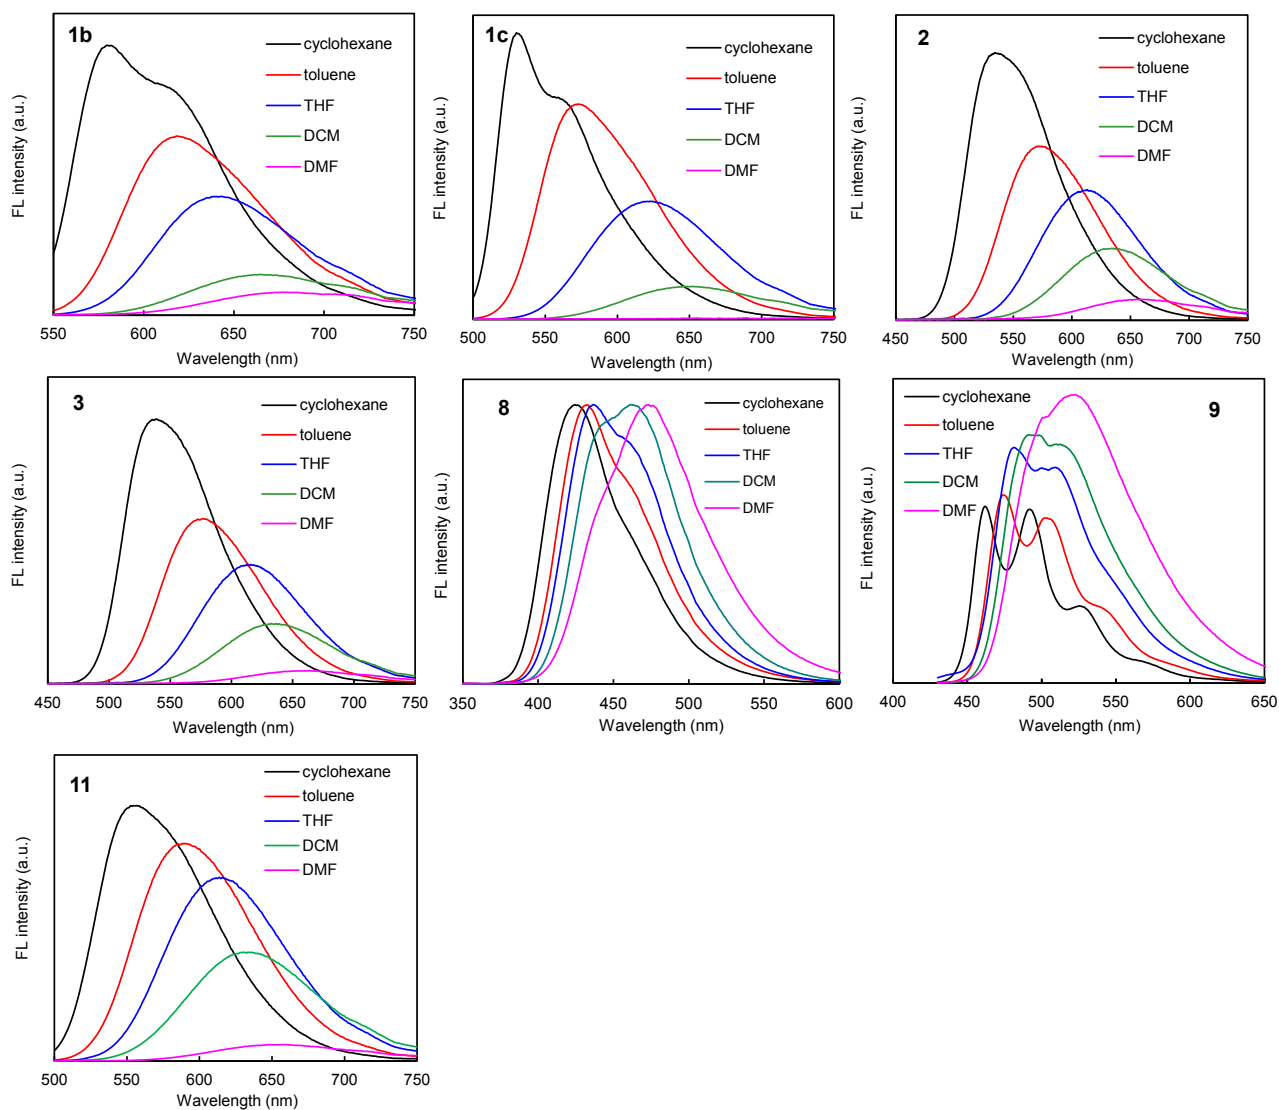

**Fig. S2** Fluorescence spectra of **1b** (ex. 510 nm), **1c** (ex. 480 nm), **2** (ex. 440 nm), **3** (ex. 440 nm), **8** (ex. 340 nm), **9** (ex. 420 nm), and **11** (ex. 455 nm) in cyclohexane, toluene, THF, dichloromethane, and DMF at  $1.0 \times 10^{-6}$  M.

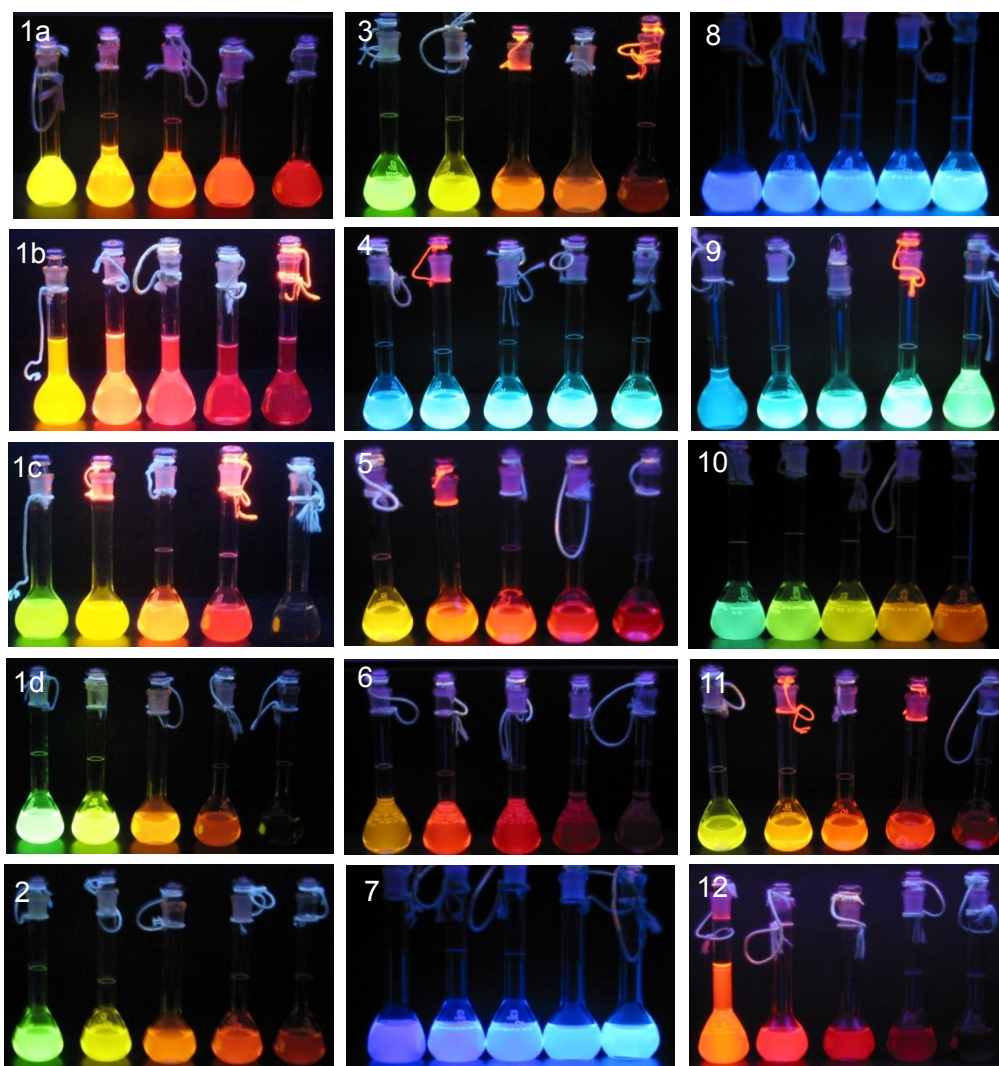

**Fig. S3** Fluorescence images of **1a**, **1b**, **1c**, **1d**, **2**, **3**, **4**, **5**, **6**, **7**, **8**, **9**, **10**, **11**, and **12** under UV light irradiation at  $1.0 \times 10^{-5}$  M (cyclohexane, toluene, THF, DCM, and DMF from left to right).



**Table S1** Spectral data of **1a–d**, **2**, **3**, **4**, **5**, **6**, **7**, **8**, **9**, **10**, **11**, and **12**

| comp.     | solvent     | $\lambda_{\text{abs}}$ (nm) <sup>a</sup> | $\varepsilon$ | $\lambda_{\text{em}}$ (nm) <sup>b</sup> | $\Phi_{\text{F}}$ <sup>c</sup> | $\Delta\lambda$ (nm) |
|-----------|-------------|------------------------------------------|---------------|-----------------------------------------|--------------------------------|----------------------|
| <b>1a</b> | cyclohexane | 460                                      | 18,900        | 557                                     | 0.85                           | 97                   |
|           | toluene     | 461                                      | 20,500        | 592                                     | 0.80                           | 131                  |
|           | THF         | 460                                      | 20,700        | 614                                     | 0.71                           | 154                  |
|           | DCM         | 459                                      | 19,500        | 639                                     | 0.36                           | 180                  |
|           | DMF         | 460                                      | 18,700        | 657                                     | 0.22                           | 197                  |
|           | solid       |                                          |               | 580                                     | 0.55 <sup>f</sup>              |                      |
| <b>1b</b> | cyclohexane | 506                                      | 42,600        | 580, 620 (sh)                           | 0.87 <sup>d</sup>              | 74                   |
|           | toluene     | 511                                      | 39,480        | 618                                     | 0.64 <sup>d</sup>              | 107                  |
|           | THF         | 510                                      | 38,550        | 640                                     | 0.32 <sup>d</sup>              | 130                  |
|           | DCM         | 512                                      | 40,330        | 665                                     | 0.18 <sup>d</sup>              | 143                  |
|           | DMF         | 512                                      | 39,520        | 679                                     | 0.12 <sup>d</sup>              | 167                  |
|           | solid       |                                          |               | 683                                     | 0.07 <sup>f</sup>              |                      |
| <b>1c</b> | cyclohexane | 475                                      | 39,760        | 530, 560 (sh)                           | 0.93                           | 55                   |
|           | toluene     | 480                                      | 37,110        | 573                                     | 0.87                           | 97                   |
|           | THF         | 479                                      | 40,160        | 619                                     | 0.52                           | 140                  |
|           | DCM         | 485                                      | 37,740        | 651                                     | 0.16                           | 166                  |
|           | DMF         | 480                                      | 37,900        | 680                                     | <0.01                          | 200                  |
|           | solid       |                                          |               | 647                                     | 0.12 <sup>f</sup>              |                      |
| <b>1d</b> | cyclohexane | 424                                      | 26,930        | 527, 550 (sh)                           | 0.79                           | 103                  |
|           | toluene     | 427                                      | 28,300        | 556                                     | 0.70                           | 129                  |
|           | THF         | 424                                      | 26,890        | 617                                     | 0.50                           | 193                  |
|           | DCM         | 422                                      | 26,980        | 643                                     | 0.14                           | 221                  |
|           | DMF         | 426                                      | 26,660        | 680                                     | <0.01                          | 254                  |
|           | solid       |                                          |               | 547                                     | 0.53 <sup>f</sup>              |                      |
| <b>2</b>  | cyclohexane | 437                                      | 15,610        | 535, 555 (sh)                           | 0.86                           | 98                   |
|           | toluene     | 439                                      | 13,980        | 575                                     | 0.74                           | 136                  |
|           | THF         | 436                                      | 13,110        | 611                                     | 0.65                           | 175                  |
|           | DCM         | 436                                      | 13,560        | 636                                     | 0.30                           | 200                  |
|           | DMF         | 435                                      | 13,700        | 664                                     | 0.11                           | 229                  |
|           | solid       |                                          |               | 538                                     | 0.47 <sup>f</sup>              |                      |
| <b>3</b>  | cyclohexane | 439                                      | 18,680        | 538                                     | 0.92                           | 99                   |
|           | toluene     | 440                                      | 15,960        | 577                                     | 0.83                           | 137                  |
|           | THF         | 436                                      | 14,720        | 613                                     | 0.77                           | 177                  |
|           | DCM         | 437                                      | 13,580        | 639                                     | 0.37                           | 202                  |
|           | DMF         | 435                                      | 13,650        | 664                                     | 0.07                           | 229                  |
|           | solid       |                                          |               | 570                                     | 0.58 <sup>f</sup>              |                      |

|           |             |     |        |                    |                   |     |
|-----------|-------------|-----|--------|--------------------|-------------------|-----|
| <b>4</b>  | cyclohexane | 380 | 9,600  | 477                | 0.71 <sup>e</sup> | 97  |
|           | toluene     | 383 | 10,280 | 482                | 0.61 <sup>e</sup> | 99  |
|           | THF         | 383 | 10,320 | 489                | 0.71 <sup>e</sup> | 106 |
|           | DCM         | 381 | 10,010 | 491                | 0.76 <sup>e</sup> | 110 |
|           | DMF         | 382 | 10,240 | 507                | 0.82 <sup>e</sup> | 125 |
|           | solid       |     |        | 484                | 0.92 <sup>f</sup> |     |
| <b>5</b>  | cyclohexane | 455 | 16,670 | 571                | 0.82              | 116 |
|           | toluene     | 461 | 17,140 | 610                | 0.63              | 149 |
|           | THF         | 462 | 17,020 | 625                | 0.59              | 163 |
|           | DCM         | 459 | 16,350 | 646                | 0.29              | 187 |
|           | DMF         | 464 | 16,590 | 666                | 0.17              | 202 |
|           | solid       |     |        | 625                | 0.53 <sup>f</sup> |     |
| <b>6</b>  | cyclohexane | 462 | 11560  | 579                | 0.72              | 117 |
|           | toluene     | 473 | 11,360 | 623                | 0.50              | 150 |
|           | THF         | 476 | 11,200 | 645                | 0.46              | 169 |
|           | DCM         | 472 | 12,780 | 670                | 0.13              | 198 |
|           | DMF         | 481 | 13,140 | 679                | 0.05              | 198 |
|           | solid       |     |        | 686                | 0.25 <sup>f</sup> |     |
| <b>7</b>  | cyclohexane | 354 | 53,140 | 401, 422           | 0.46 <sup>e</sup> | 47  |
|           | toluene     | 358 | 54,650 | 409, 428           | 0.45 <sup>e</sup> | 51  |
|           | THF         | 356 | 55,000 | 415, 430 (sh)      | 0.37 <sup>e</sup> | 59  |
|           | DCM         | 357 | 53,270 | 426, 465 (sh)      | 0.50 <sup>e</sup> | 69  |
|           | DMF         | 359 | 54,690 | 434, 470 (sh)      | 0.56 <sup>e</sup> | 75  |
|           | solid       |     |        | 447                | 0.59 <sup>f</sup> |     |
| <b>8</b>  | cyclohexane | 342 | 353,00 | 425, 460 (sh)      | 0.41 <sup>e</sup> | 83  |
|           | toluene     | 345 | 32,270 | 432, 460 (sh)      | 0.42 <sup>e</sup> | 87  |
|           | THF         | 343 | 33,810 | 437, 460 (sh)      | 0.48 <sup>e</sup> | 93  |
|           | DCM         | 345 | 31,430 | 445 (sh), 462      | 0.55 <sup>e</sup> | 117 |
|           | DMF         | 346 | 31,120 | 445 (sh), 473      | 0.55 <sup>e</sup> | 127 |
|           | solid       |     |        | 420                | 0.59 <sup>f</sup> |     |
| <b>9</b>  | cyclohexane | 421 | 69,260 | 462, 491, 525      | 0.33              | 41  |
|           | toluene     | 427 | 69,840 | 474, 503, 542      | 0.40              | 47  |
|           | THF         | 426 | 73,780 | 483, 509, 550 (sh) | 0.41              | 57  |
|           | DCM         | 427 | 69,170 | 491, 513           | 0.51              | 64  |
|           | DMF         | 429 | 68,080 | 499 (sh), 522      | 0.60              | 93  |
|           | solid       |     |        | 609                | 0.15 <sup>f</sup> |     |
| <b>10</b> | cyclohexane | 419 | 14,660 | 517                | 0.78              | 98  |
|           | toluene     | 417 | 15,710 | 543                | 0.78              | 126 |
|           | THF         | 412 | 15,160 | 564                | 0.66              | 152 |

|           |             |     |        |     |                   |     |
|-----------|-------------|-----|--------|-----|-------------------|-----|
|           | DCM         | 414 | 14,010 | 596 | 0.44              | 182 |
|           | DMF         | 411 | 15,870 | 615 | 0.34              | 204 |
|           | solid       |     |        | 520 | 0.52 <sup>f</sup> |     |
| <b>11</b> | cyclohexane | 457 | 18,790 | 557 | 0.82              | 100 |
|           | toluene     | 458 | 21,460 | 590 | 0.81              | 132 |
|           | THF         | 455 | 20,730 | 614 | 0.68              | 159 |
|           | DCM         | 456 | 20,230 | 636 | 0.50              | 180 |
|           | DMF         | 453 | 20,380 | 659 | 0.11              | 206 |
|           | solid       |     |        | 590 | 0.71 <sup>f</sup> |     |
| <b>12</b> | cyclohexane | 508 | 26,910 | 607 | 0.63 <sup>d</sup> | 99  |
|           | toluene     | 507 | 25,150 | 646 | 0.40 <sup>d</sup> | 147 |
|           | THF         | 504 | 24,450 | 665 | 0.20 <sup>d</sup> | 164 |
|           | DCM         | 506 | 23,070 | 683 | 0.07 <sup>d</sup> | 177 |
|           | DMF         | 501 | 23,400 | -   | -                 | -   |
|           | solid       |     |        | 641 | 0.36 <sup>f</sup> |     |

<sup>a</sup> at  $1.0 \times 10^{-5}$  M.

<sup>b</sup> at  $1.0 \times 10^{-6}$  M.

<sup>c</sup> Determined relative to fluorescein ( $\Phi_F$  0.97, ex 455 nm) in ethanol at 0.001 mM.

<sup>d</sup> Determined relative to rhodamine B ( $\Phi_F$  0.65, ex 535 nm) in ethanol at 0.001 mM.

<sup>e</sup> Determined relative to quinine sulfate ( $\Phi_F$  0.55, ex 350 nm) in 1 N sulfuric acid at 0.001 mM.

<sup>f</sup> Absolute fluorescence quantum yield.

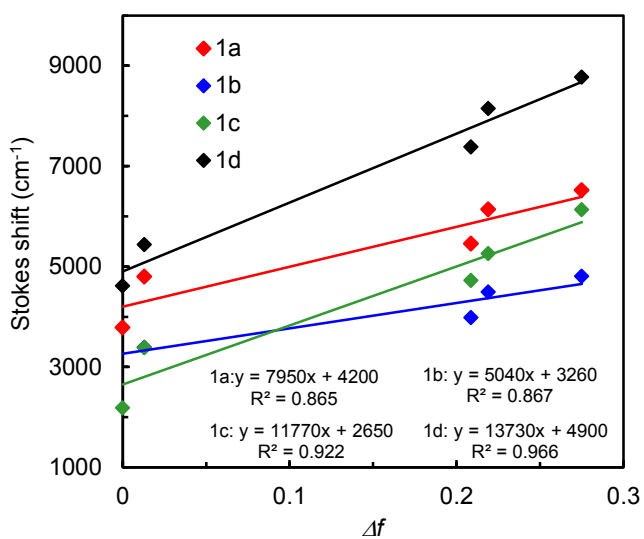

**Fig. S4** Plots of the Stokes shift ( $\Delta \nu = \nu_{\text{abs}} - \nu_{\text{FL}}$ ) against the solvent polarity parameter ( $\Delta f$ ) for **1a–d** in cyclohexane, toluene, THF, DCM, and DMF. The relationship between the Stokes shift and the solvent polarity parameter is evaluated by Mataka-Lippert equations:

$$\Delta \nu = \nu_{\text{abs}} - \nu_{\text{FL}} = 2\Delta f(\mu_e - \mu_g)^2 / (hca^3)$$

$$\Delta f = (\varepsilon - 1) / (2\varepsilon + 1) - (n^2 - 1) / (2n^2 + 1),$$

$h$  is the Plank constant,  $c$  is the speed of light,  $a$  is the Onsager cavity radius,  $\mu_e$  and  $\mu_g$  refer to the dipole moments in the excited and ground states, and  $\varepsilon$  and  $n$  are the dielectric constant and refractive index of the solvents.

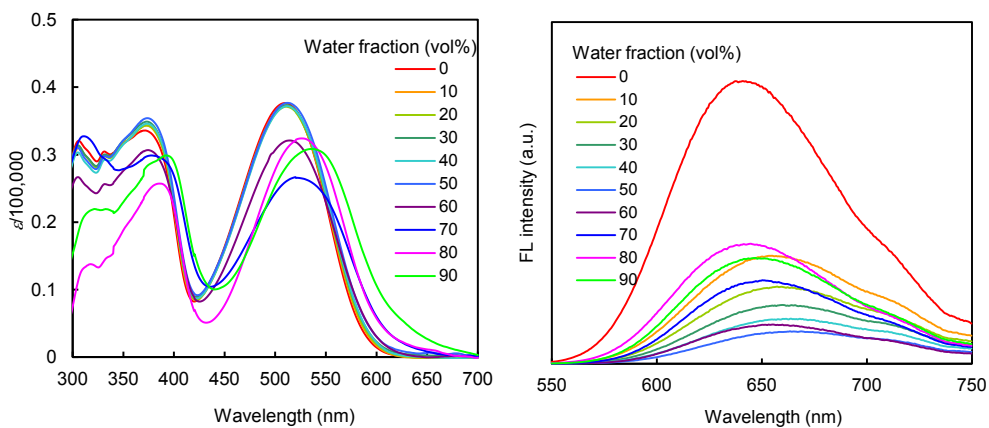

**Fig. S5** UV/Vis and fluorescence (ex. 510 nm) spectra of **1b** in THF/water (10:0, 9:1, 8:2, 7:3, 6:4, 5:5, 4:6, 3:7, 2:8, 1:9, (v/v)) at  $1.0 \times 10^{-5}$  M (1 cm width cell).

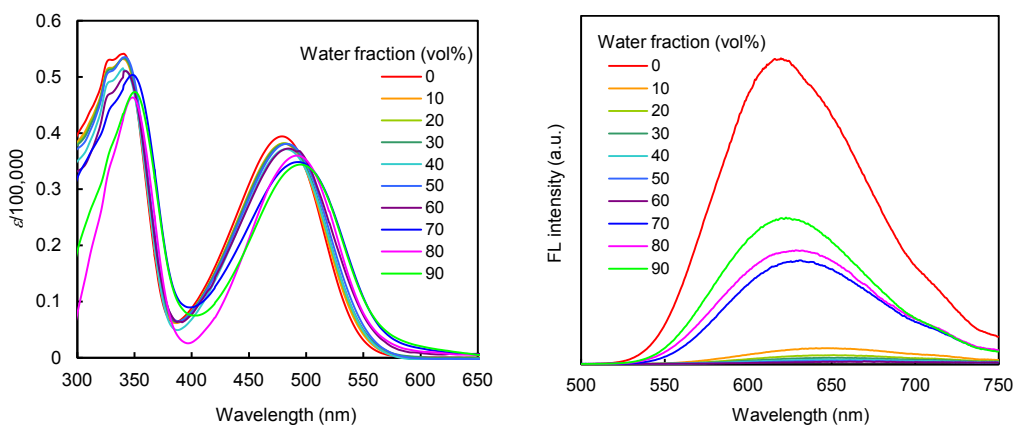

**Fig. S6** UV/Vis and fluorescence (ex. 480 nm) spectra of **1c** in THF/water (10:0, 9:1, 8:2, 7:3, 6:4, 5:5, 4:6, 3:7, 2:8, 1:9, (v/v)) at  $1.0 \times 10^{-5}$  M (1 cm width cell).

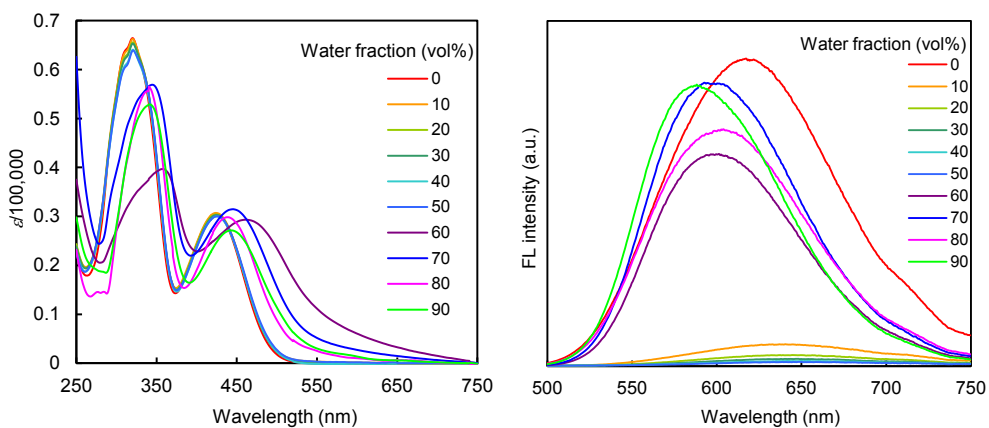

**Fig. S7** UV/Vis and fluorescence (ex. 420 nm) spectra of **1d** in THF/water (10:0, 9:1, 8:2, 7:3, 6:4, 5:5, 4:6, 3:7, 2:8, 1:9, (v/v)) at  $1 \times 10^{-5}$  M (1 cm width cell). At 60 and 70% water fraction, precipitates were formed.

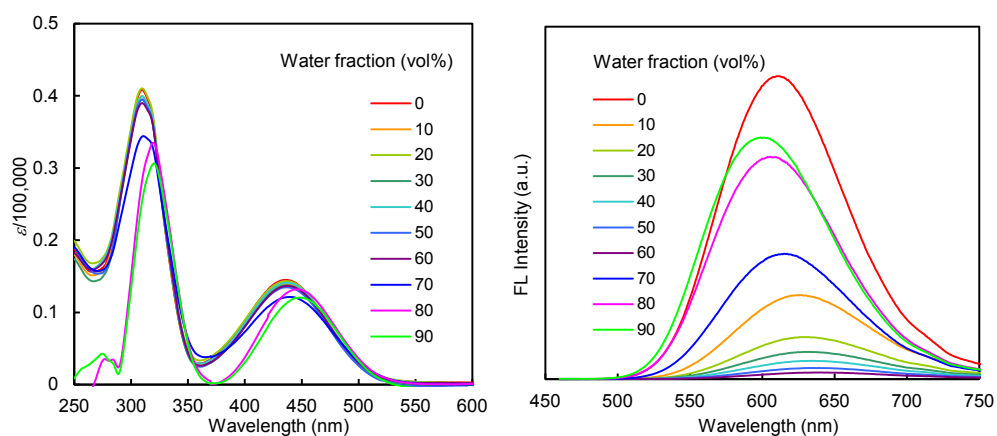

**Fig. S8** UV/Vis and fluorescence (ex. 440 nm) spectra of **2** in THF/water (10:0, 9:1, 8:2, 7:3, 6:4, 5:5, 4:6, 3:7, 2:8, 1:9, (v/v)) at  $1.0 \times 10^{-5}$  M (1 cm width cell).

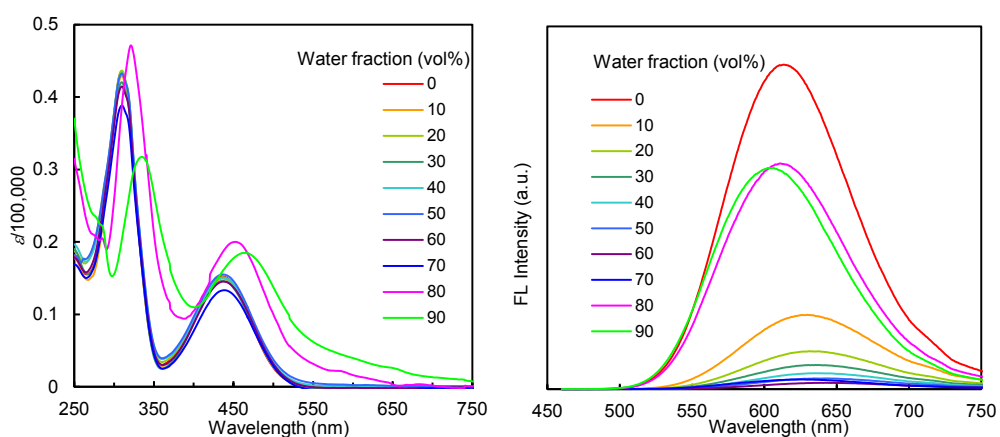

**Fig. S9** UV/Vis and fluorescence (ex. 440 nm) spectra of **3** in THF/water (10:0, 9:1, 8:2, 7:3, 6:4, 5:5, 4:6, 3:7, 2:8, 1:9, (v/v)) at  $1.0 \times 10^{-5}$  M (1 cm width cell).

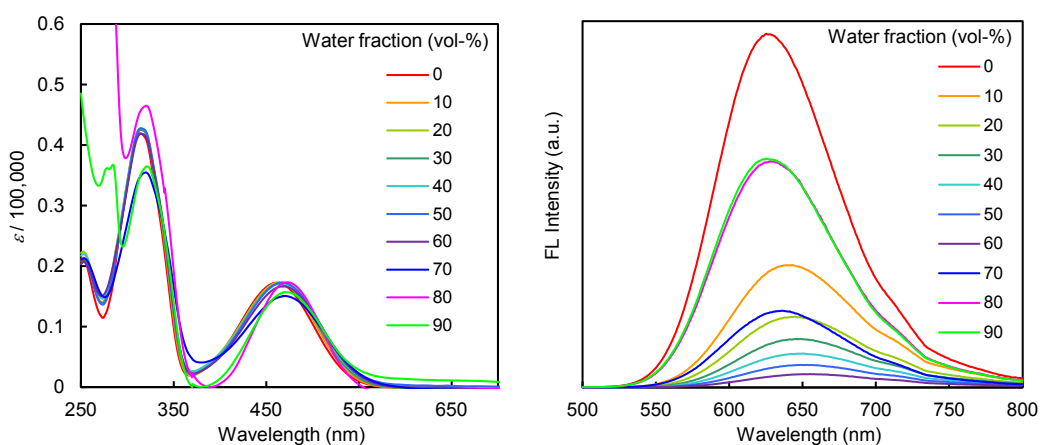

**Fig. S10** UV/Vis and fluorescence (ex. 450 nm) spectra of **5** in THF/water (10:0, 9:1, 8:2, 7:3, 6:4, 5:5, 4:6, 3:7, 2:8, 1:9, (v/v)) at  $1.0 \times 10^{-5}$  M (1 cm width cell).

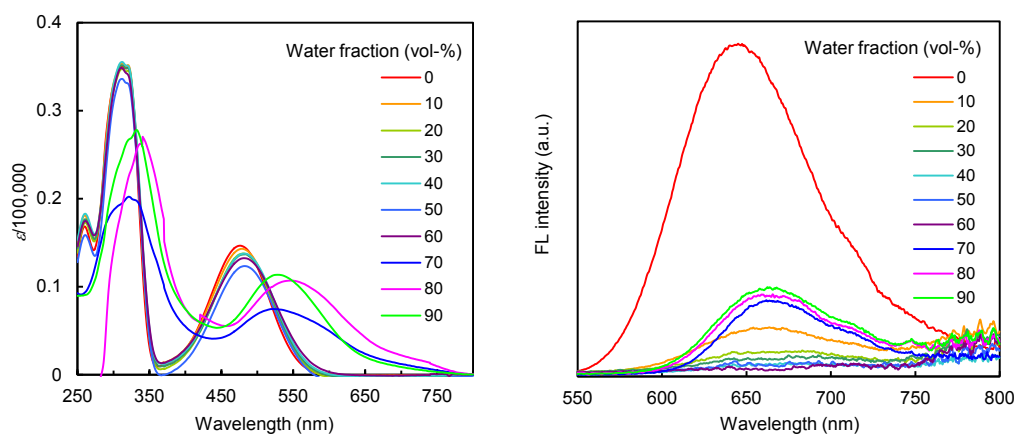

**Fig. S11** UV/Vis and fluorescence (ex. 500 nm) spectra of **6** in THF/water (10:0, 9:1, 8:2, 7:3, 6:4, 5:5, 4:6, 3:7, 2:8, 1:9, (v/v)) at  $1.0 \times 10^{-5}$  M (1 cm width cell).

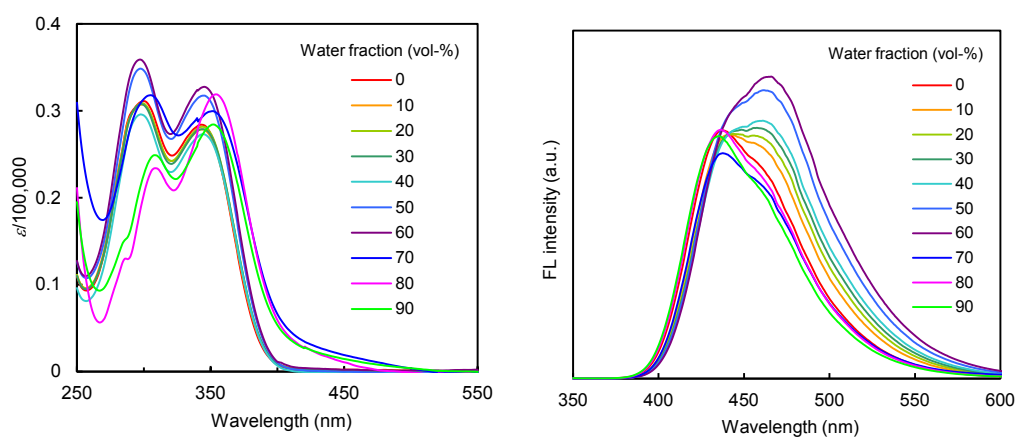

**Fig. S12** UV/Vis and fluorescence (ex. 340 nm) spectra of **8** in THF/water (10:0, 9:1, 8:2, 7:3, 6:4, 5:5, 4:6, 3:7, 2:8, 1:9, (v/v)) at  $1.0 \times 10^{-5}$  M (1 cm width cell).

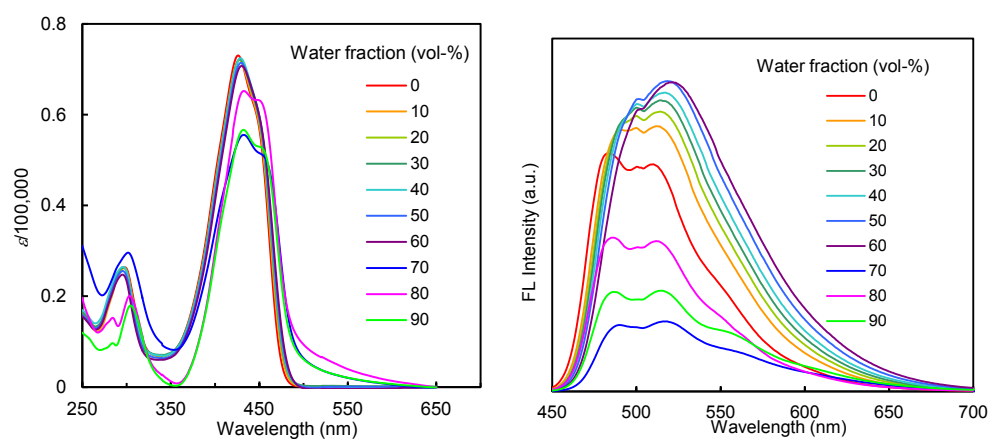

**Fig. S13** UV/Vis and fluorescence (ex. 430 nm) spectra of **9** in THF/water (10:0, 9:1, 8:2, 7:3, 6:4, 5:5, 4:6, 3:7, 2:8, 1:9, (v/v)) at  $1.0 \times 10^{-5}$  M (1 cm width cell).

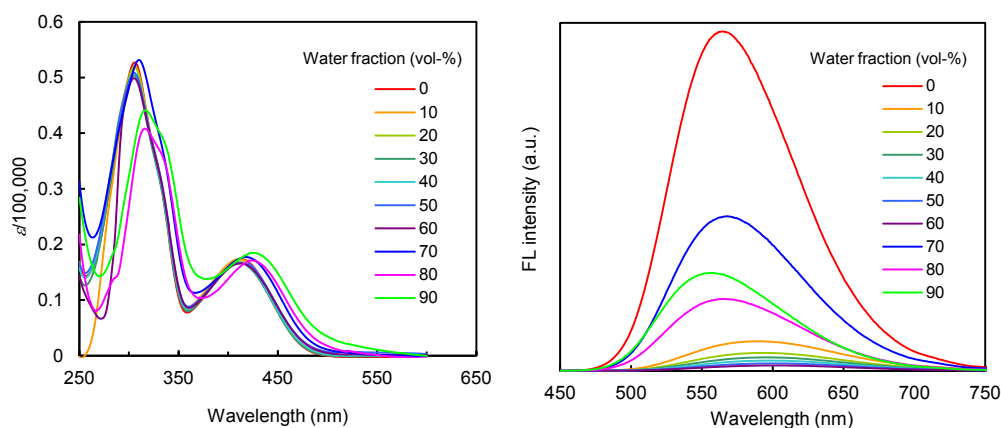

**Fig. S14** UV/Vis and fluorescence (ex. 420 nm) spectra of **10** in THF/water (10:0, 9:1, 8:2, 7:3, 6:4, 5:5, 4:6, 3:7, 2:8, 1:9, (v/v) at  $1.0 \times 10^{-5}$  M (1 cm width cell).

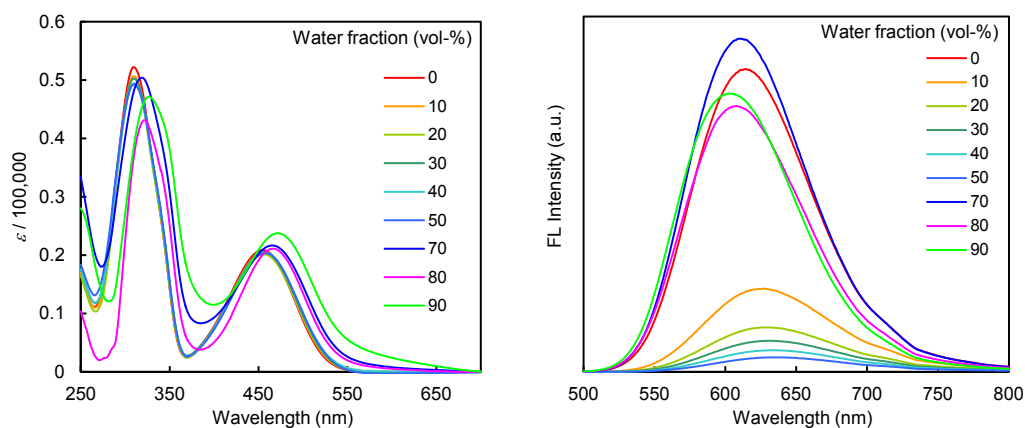

**Fig. S15** UV/Vis and fluorescence (ex. 455 nm) spectra of **11** in THF/water (10:0, 9:1, 8:2, 7:3, 6:4, 5:5, 4:6, 3:7, 2:8, 1:9, (v/v) at  $1.0 \times 10^{-5}$  M (1 cm width cell). At 60% water fraction, precipitate was formed.

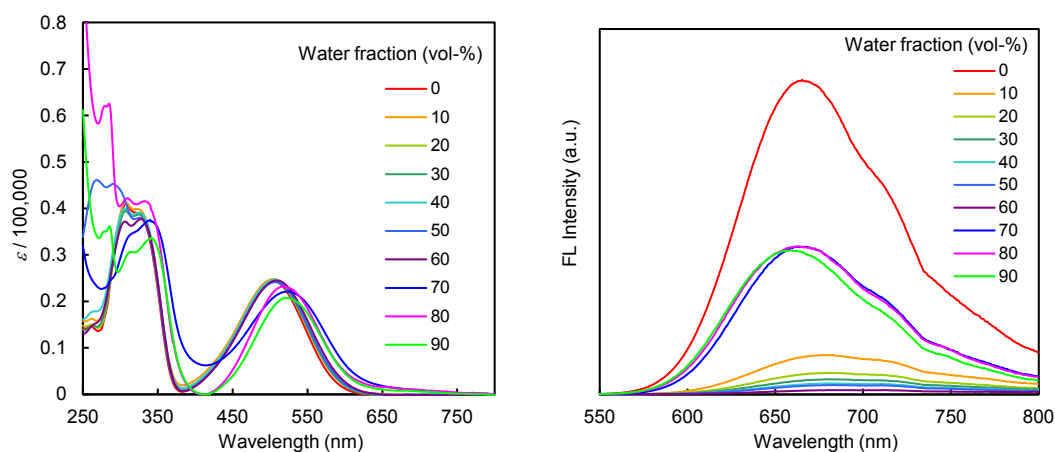

**Fig. S16** UV/Vis and fluorescence (ex. 500 nm) spectra of **12** in THF/water (10:0, 9:1, 8:2, 7:3, 6:4, 5:5, 4:6, 3:7, 2:8, 1:9, (v/v) at  $1.0 \times 10^{-5}$  M (1 cm width cell).



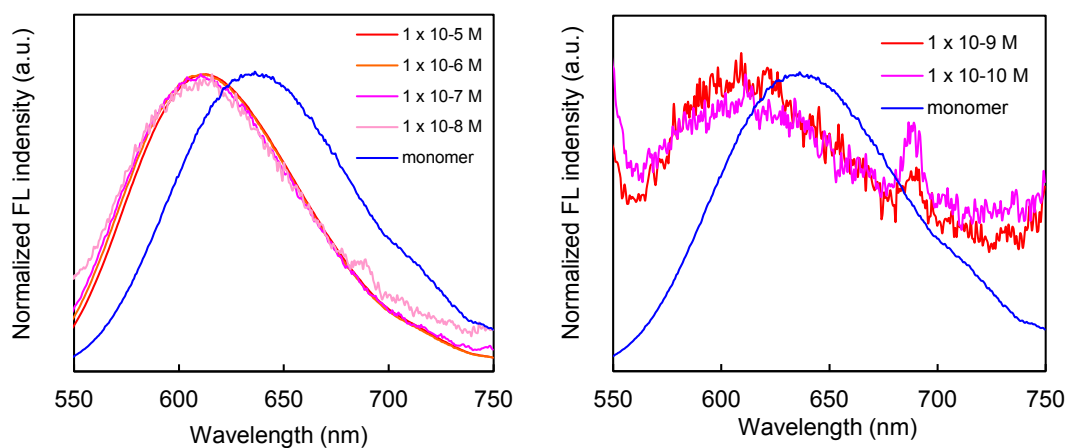

**Fig. S17** Fluorescence spectra of **1a** in THF/water (1:9, v/v) at  $1 \times 10^{-5}$ ,  $1 \times 10^{-6}$ ,  $1 \times 10^{-7}$ ,  $1 \times 10^{-8}$ ,  $1 \times 10^{-9}$ , and  $1.0 \times 10^{-10}$  M. The emission band was scarcely changed around 610 nm, which was different to the monomer emission around 640 nm in THF/water (5:5, v/v)

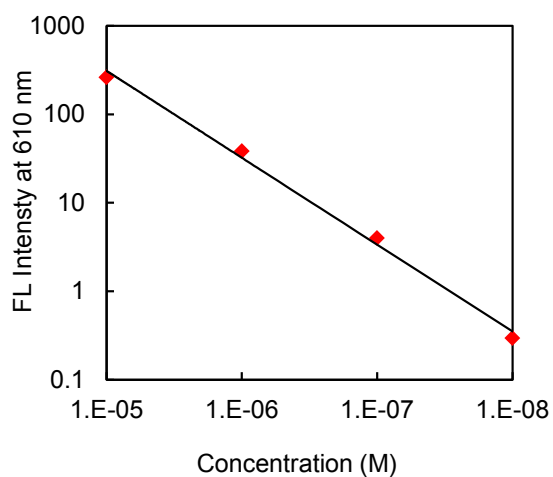

**Fig. S18** Plot of the fluorescence intensity (at 610 nm) *versus* the concentration of **1a** in THF/water (1:9, v/v).

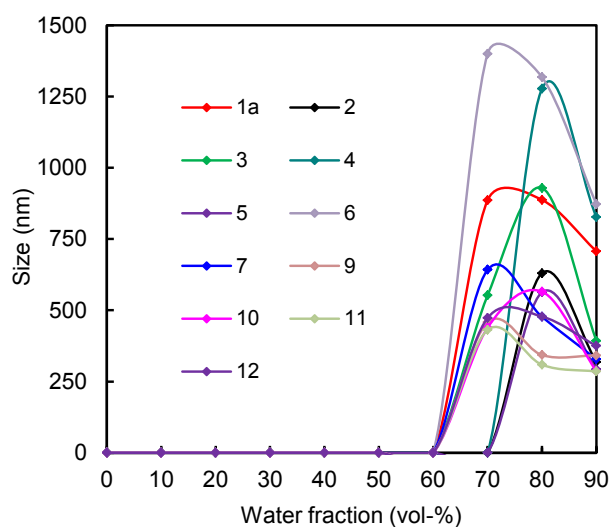

**Fig. S19** Plots of the aggregate size measured by DLS *versus* the water fraction (vol%) of **1a**, **2**, **3**, **4**, **5**, **6**, **7**, **9**, **10**, **11**, and **12** in THF/water at  $1.0 \times 10^{-5}$  M. Aggregate size at 90% water fraction: 700 nm for **1a**, 320 nm for **2**, 390 nm for **3**, 830 nm for **4**, 290 nm for **5**, 870 nm for **6**, 330 nm for **7**, 340 nm for **9**, 290 nm for **10**, 290 nm for **11**, and 380 nm for **12**.

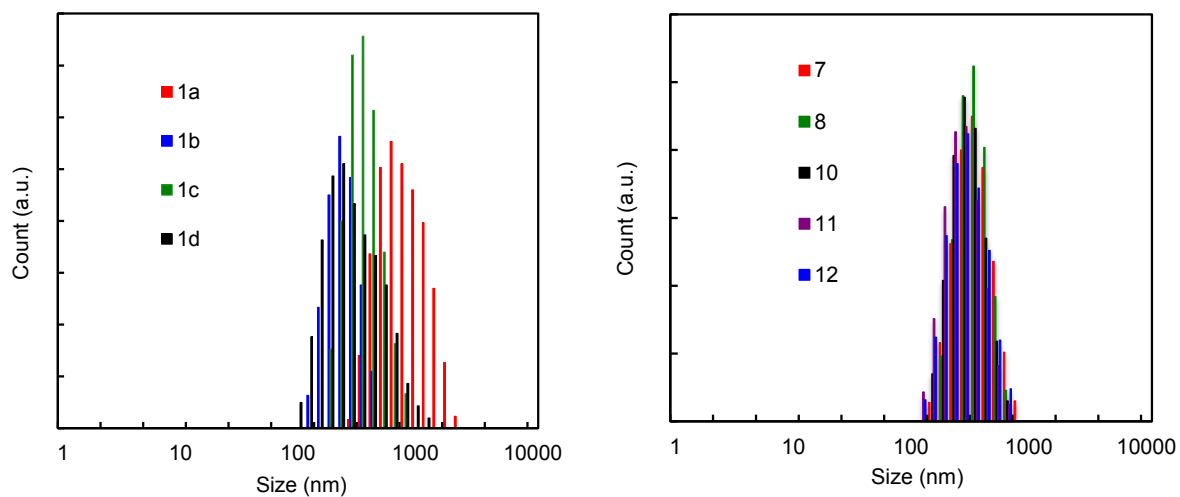

**Fig. S20** DLS charts of **1a** (700 nm), **1b** (270 nm), **1c** (350 nm), **1d** (250 nm), **7** (330 nm), **8** (320 nm), **10** (290 nm), **11** (290 nm), and **12** (380 nm) in THF/water (1:9, v/v) at  $1.0 \times 10^{-5}$  M.

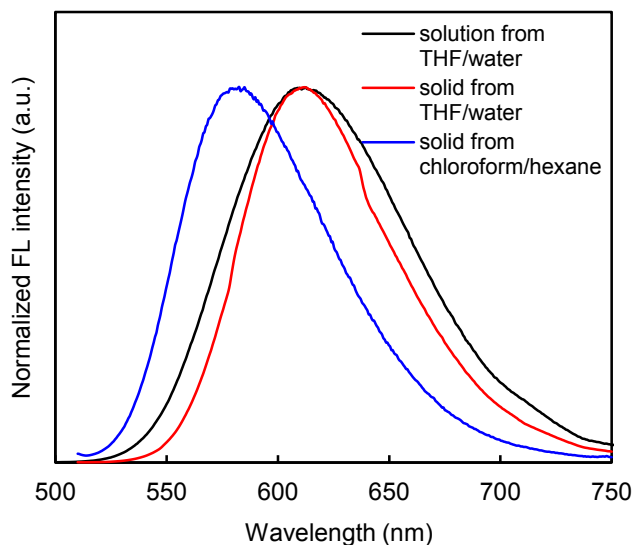

**Fig. S21** Fluorescence spectra of **1a** in the solution and solid state: aggregate solution in THF/water (90% water fraction), powder-like solid sample from THF/water (90% water fraction), and crystalline-like solid sample from chloroform/hexane. The fluorescence spectrum (610 nm) of the powder-like sample was similar to that (610 nm) of the aggregate solution, but not to that (580 nm) of the crystalline-like sample. Thus, the aggregate structure formed in THF/water media is preserved in the powder-like solid state. In the THF/water media, less-ordered aggregation proceeded owing to the nonplanar triphenylamine moieties, preventing an ordered packing of the molecules and thus producing an increased number of conformations of the molecules. In contrast, one of the conformer was obtained mainly in the crystalline-like sample, leading to the difference of emission band.

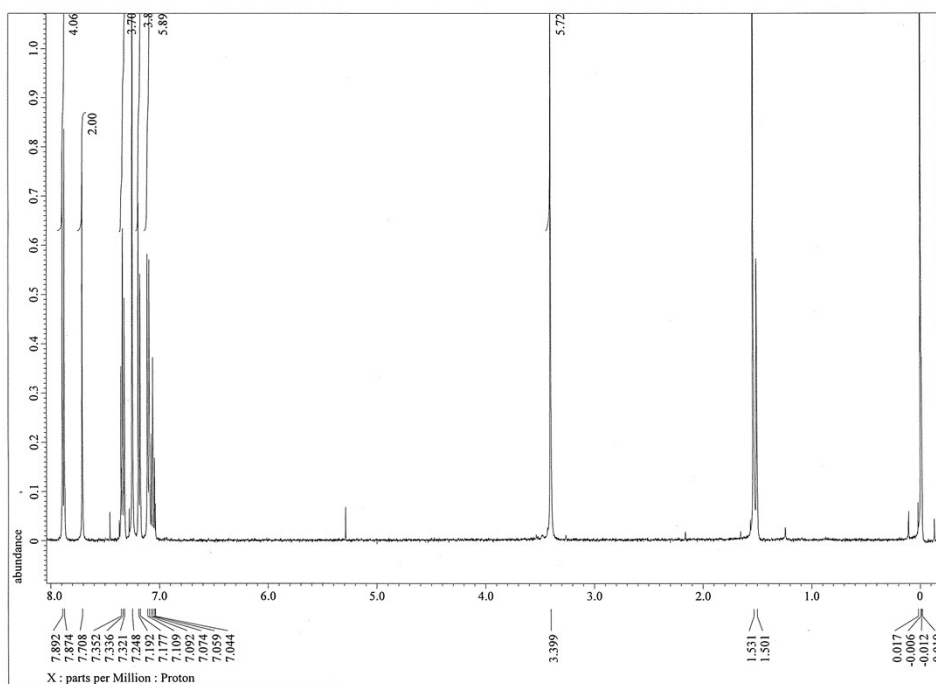

Fig. S22  $^1\text{H}$  NMR spectrum of **5** in  $\text{CDCl}_3$ .

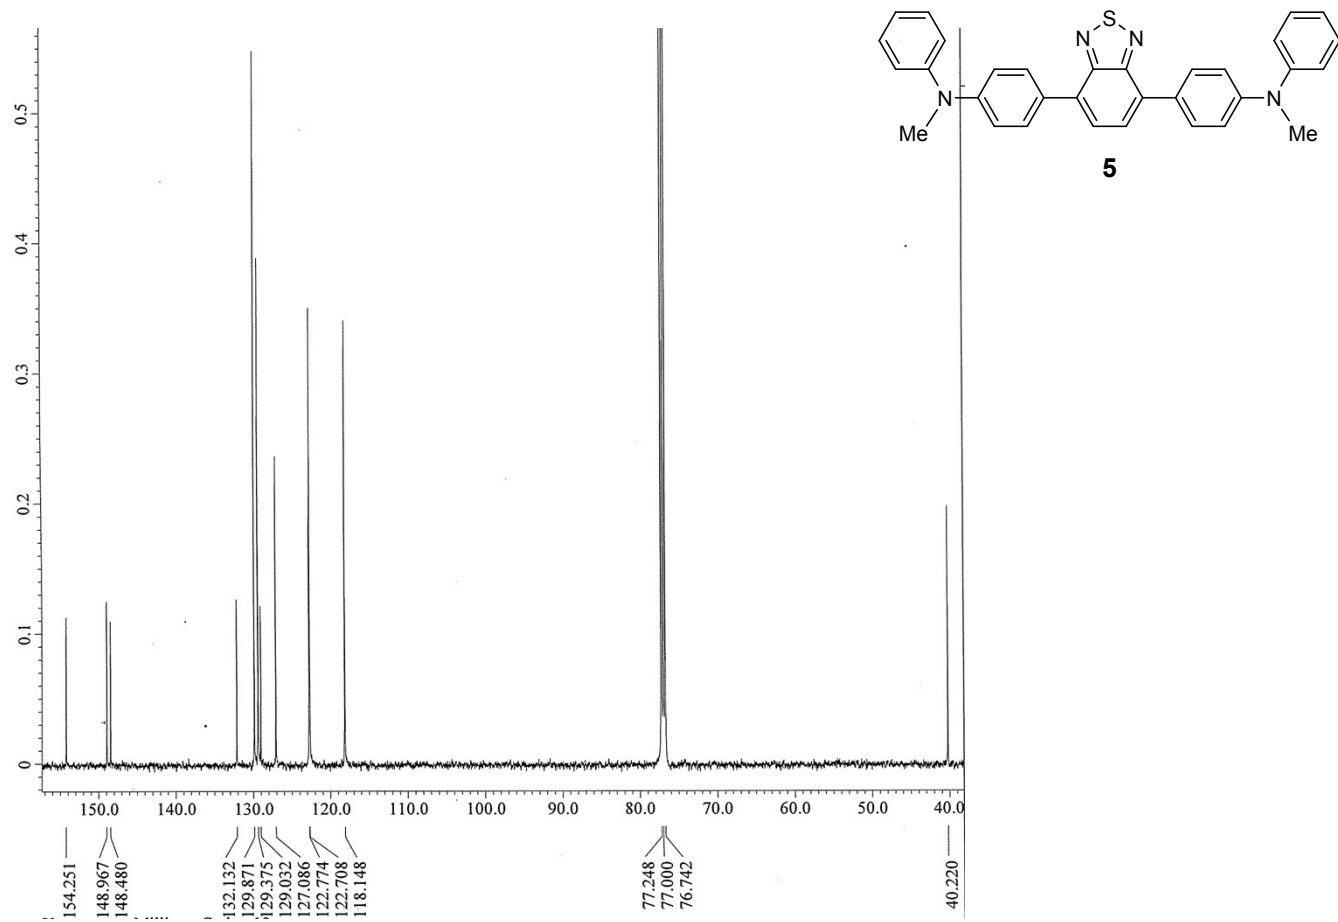

Fig. S23  $^{13}\text{C}$  NMR spectrum of **5** in  $\text{CDCl}_3$ .

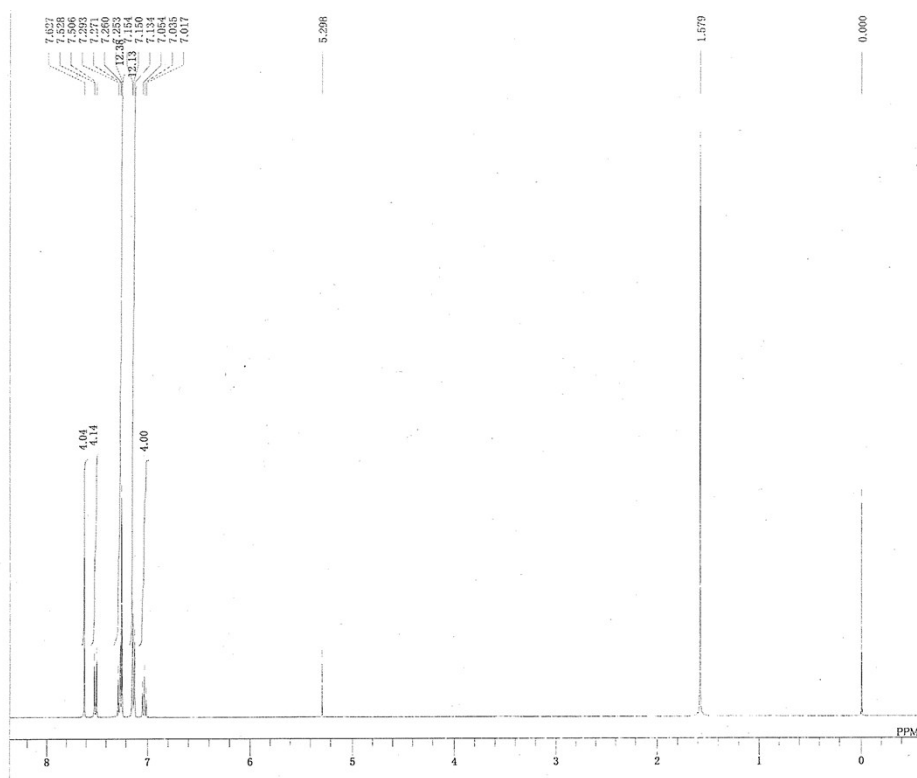

Fig. S24  $^1\text{H}$  NMR spectrum of **7** in  $\text{CDCl}_3$ .

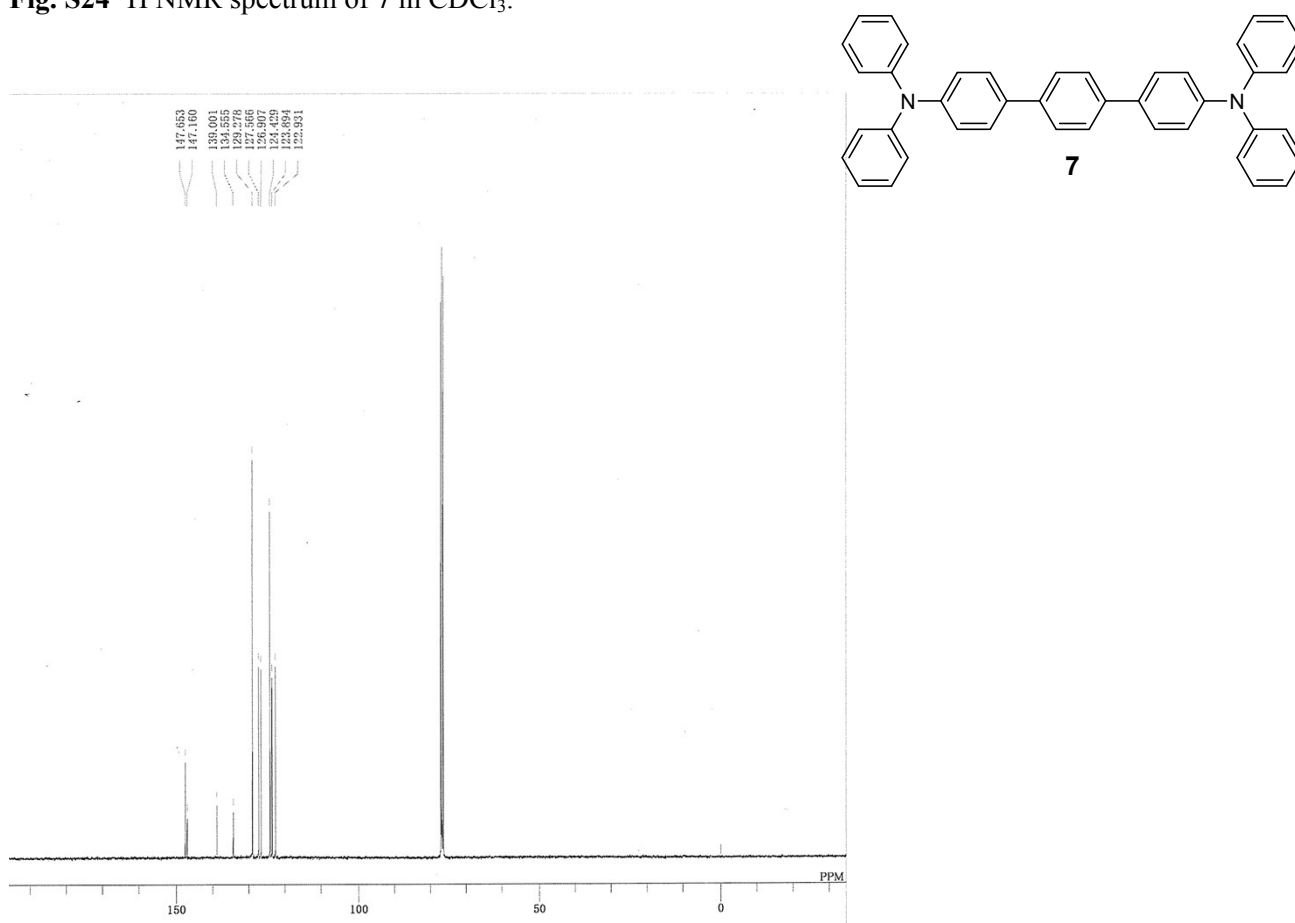

Fig. S25  $^{13}\text{C}$  NMR spectrum of **7** in  $\text{CDCl}_3$ .

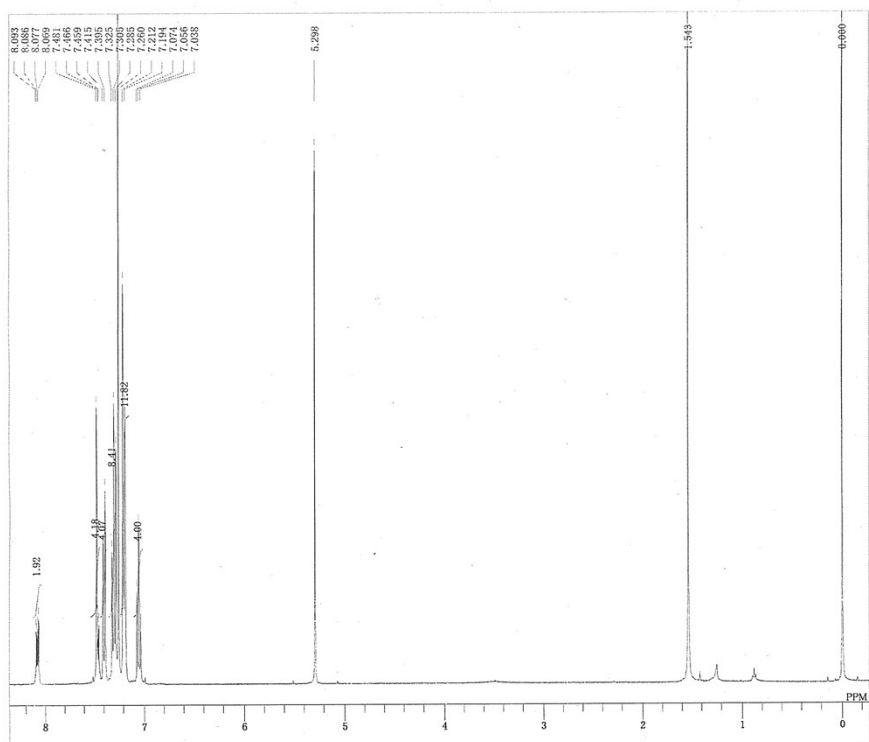

**Fig. S26**  $^1\text{H}$  NMR spectrum of **8** in  $\text{CDCl}_3$ .

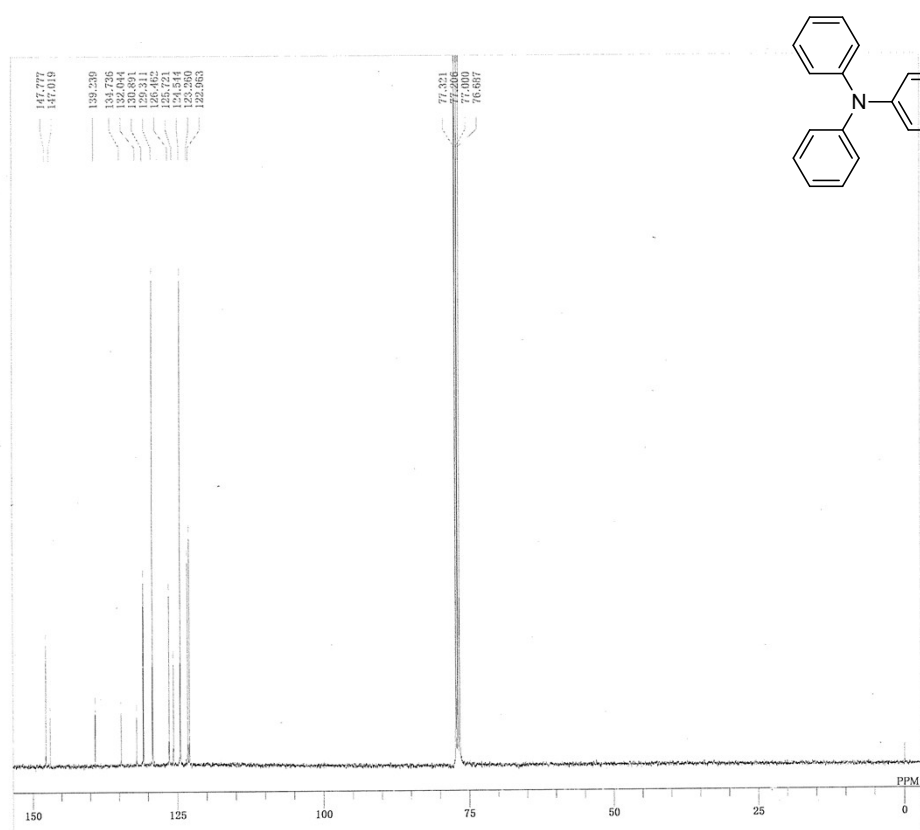

**Fig. S27**  $^{13}\text{C}$  NMR spectrum of **8** in  $\text{CDCl}_3$ .

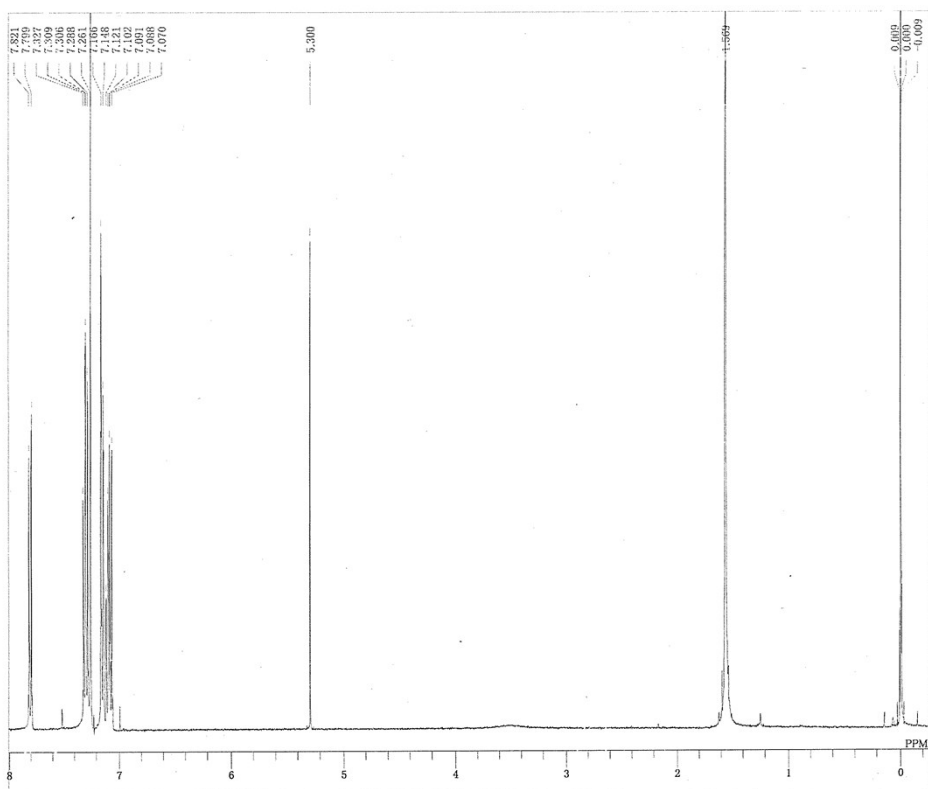

Fig. S28  $^1\text{H}$  NMR spectrum of **9** in  $\text{CDCl}_3$ .

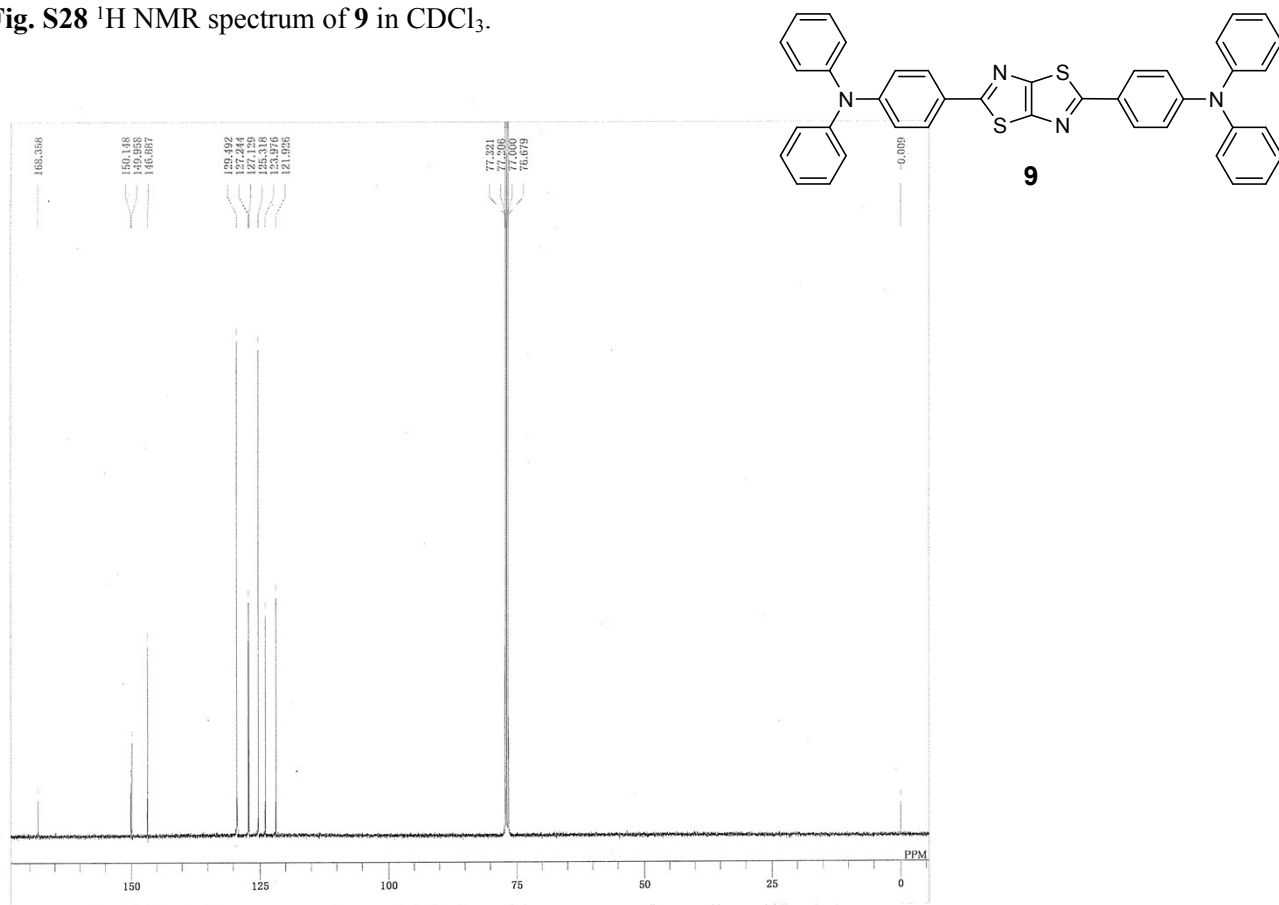

Fig. S29  $^{13}\text{C}$  NMR spectrum of **9** in  $\text{CDCl}_3$ .

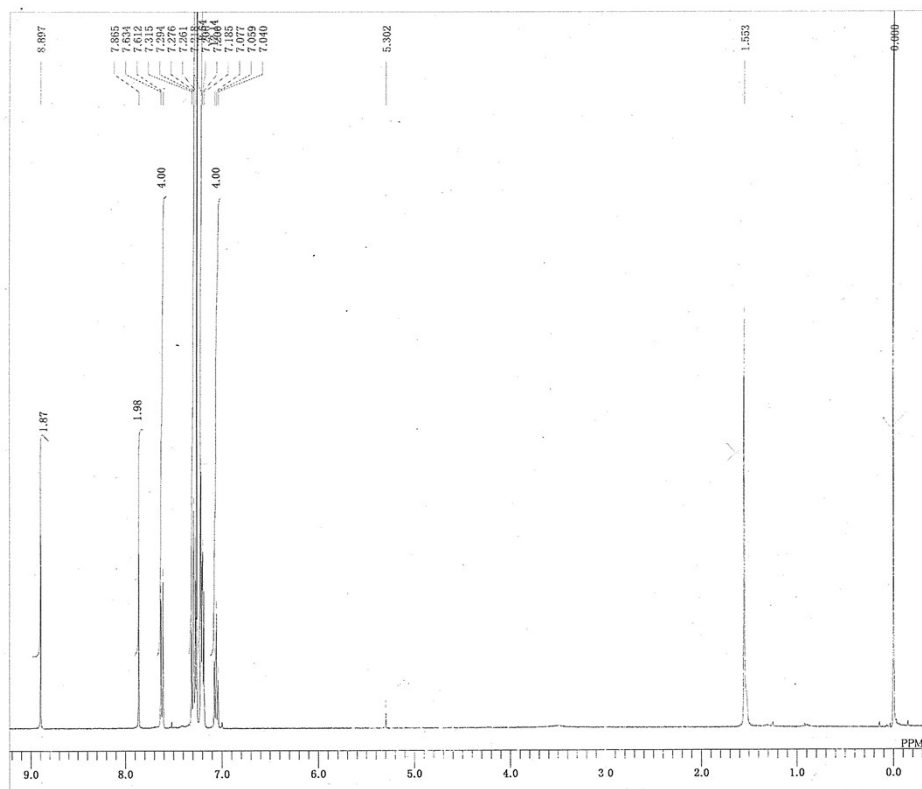

Fig. S30  $^1\text{H}$  NMR spectrum of **10** in  $\text{CDCl}_3$ .

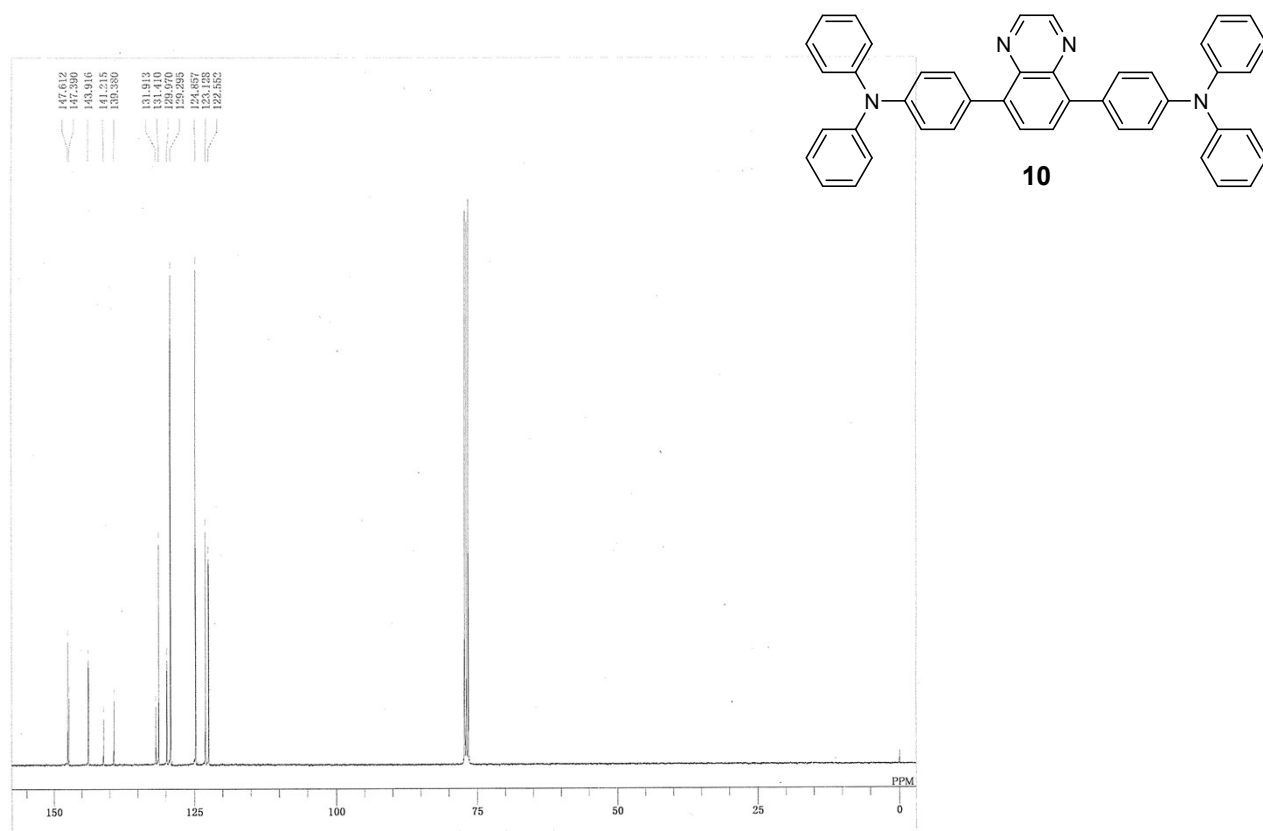

Fig. S31  $^{13}\text{C}$  NMR spectrum of **10** in  $\text{CDCl}_3$ .



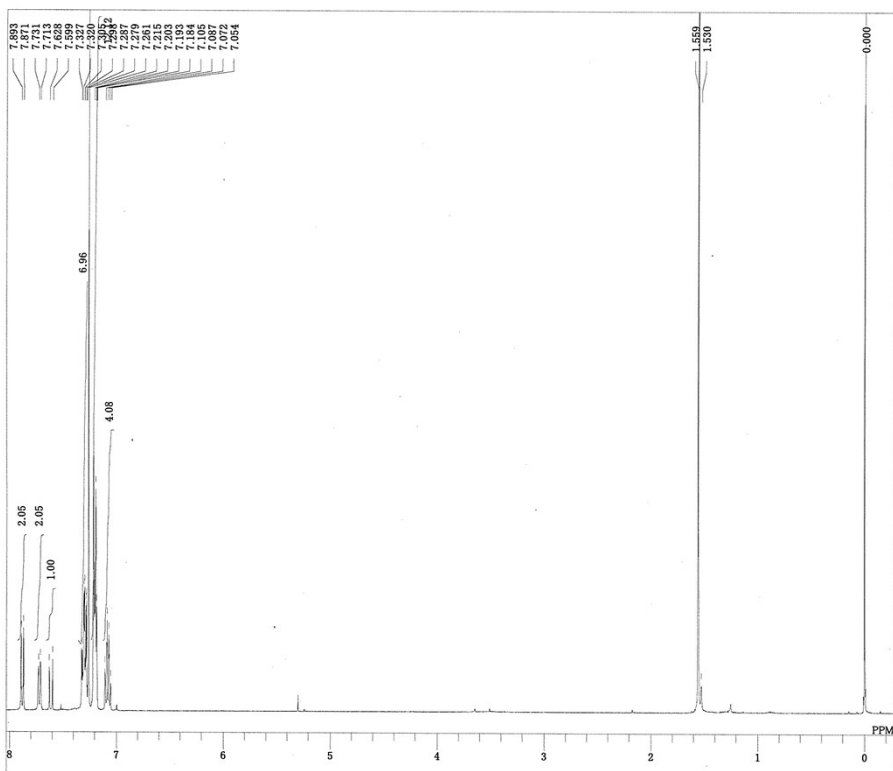

Fig. S32 <sup>1</sup>H NMR spectrum of **11** in CDCl<sub>3</sub>.

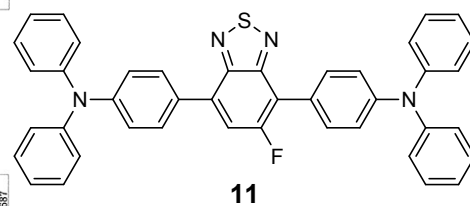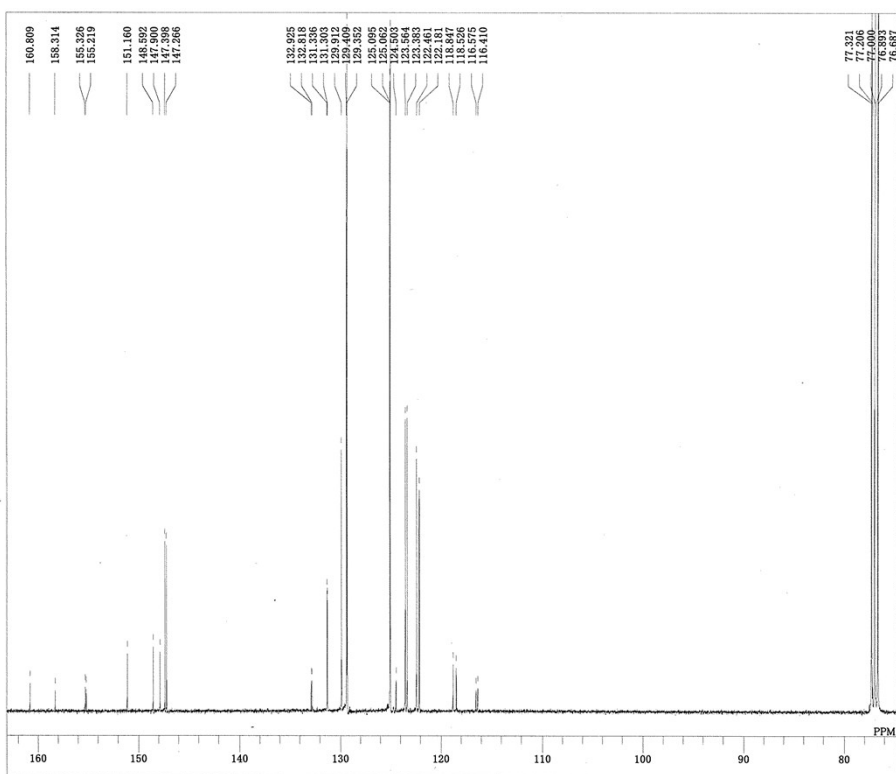

Fig. S33 <sup>13</sup>C NMR spectrum of **11** in CDCl<sub>3</sub>.



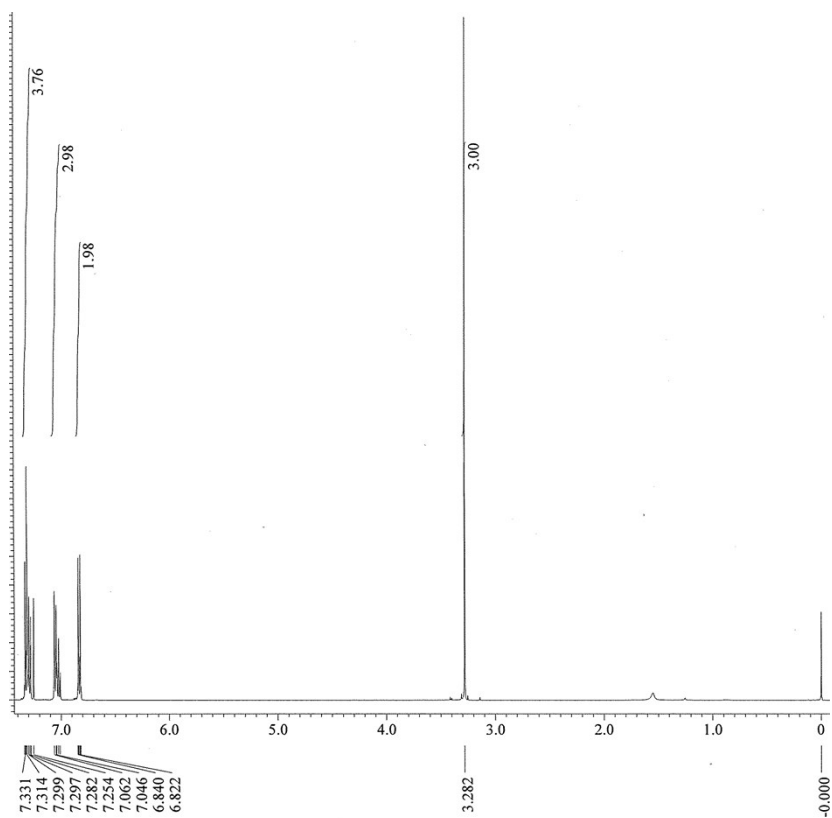

Fig. S36  $^1\text{H}$  NMR spectrum of **14** in  $\text{CDCl}_3$ .

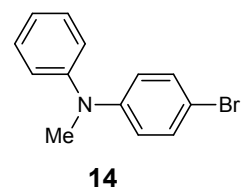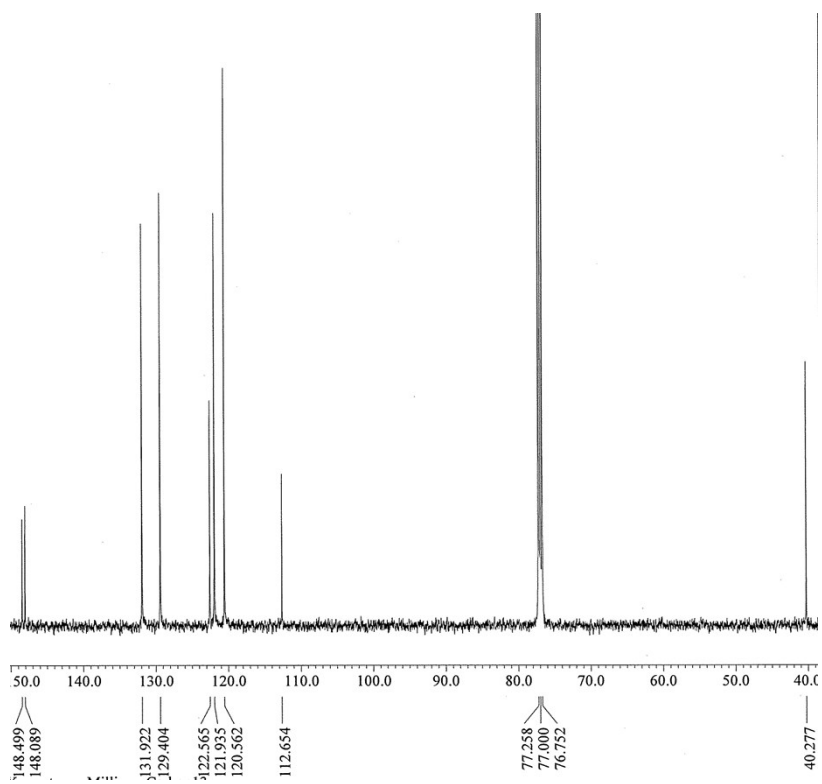

Fig. S37  $^{13}\text{C}$  NMR spectrum of **14** in  $\text{CDCl}_3$ .

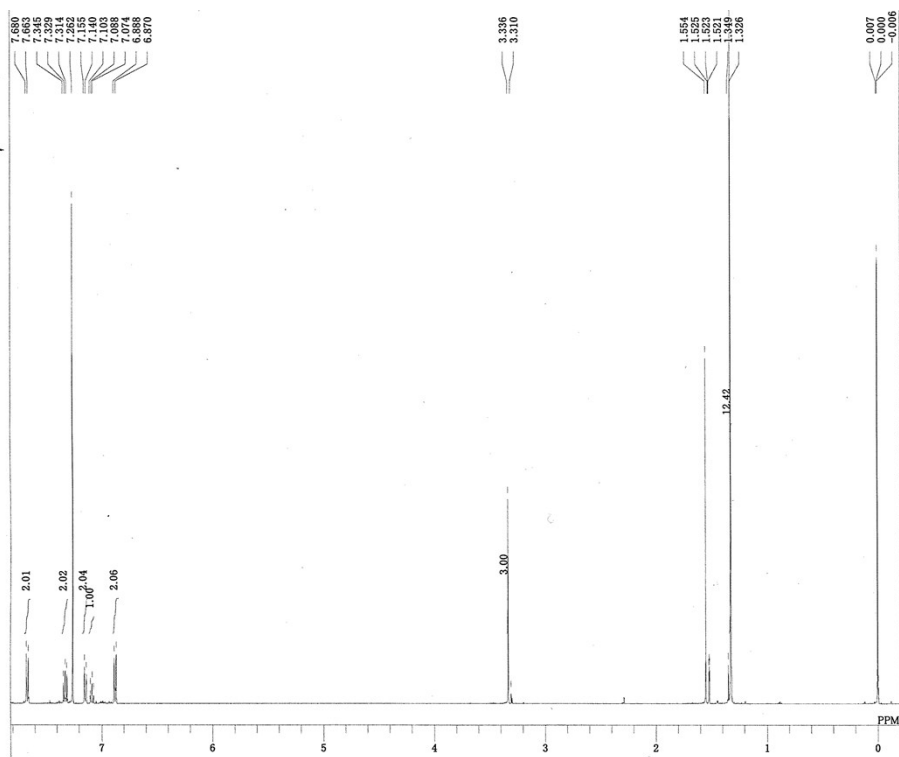

Fig. S38  $^1\text{H}$  NMR spectrum of **15** in  $\text{CDCl}_3$ .

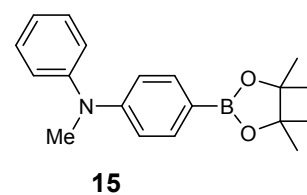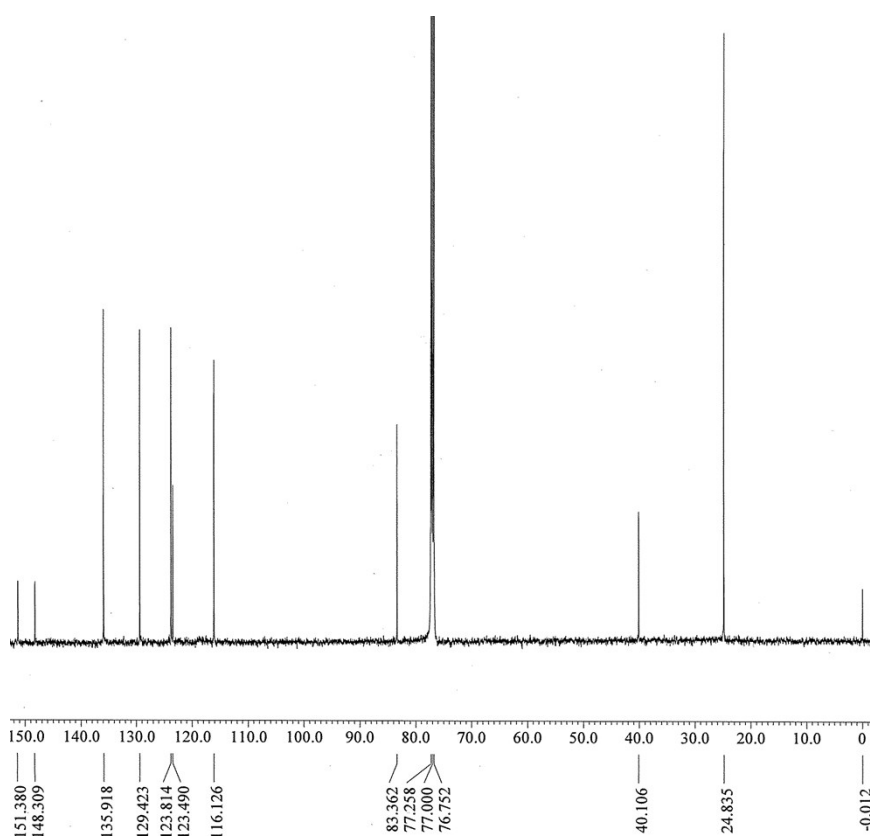

Fig. S39  $^{13}\text{C}$  NMR spectrum of **15** in  $\text{CDCl}_3$ .
